# Supplementary material for: Integrative Analyses of Transcriptomics and Metabolomics in Sex Differentiation of Mulberry Flowers
Source: Front Mol Biosci. 2022 May 5;9:881090. doi: 10.3389/fmolb.2022.881090 (PMC9117626; doi:10.3389/fmolb.2022.881090)
Supplement: Supplementary file 6 [file Table5.XLSX]

## Sheet: Sheet1
Index	Formula	Compounds	Class I	Class II	CAS	Fold_Change	Log2FC	Type
HJAP104	C7H6O	Benzaldehyde	Phenolic acids	Phenolic acids	100-52-7	3.2988	1.72194	up
Lmbn000121	C4H6N2O2	3-Cyano-L-alanine	Amino acids and derivatives	Amino acids and derivatives	6232-19-5	0.423176	-1.24067	down
pme0006	C5H9NO2	L-Proline	Amino acids and derivatives	Amino acids and derivatives	147-85-3	0.38399	-1.38086	down
mws0256	C5H11NO2	L-Valine	Amino acids and derivatives	Amino acids and derivatives	72-18-4	0.418416	-1.25699	down
mws0628	C7H6O2	4-Hydroxybenzaldehyde*	Phenolic acids	Phenolic acids	123-08-0	4.64025	2.2142	up
pme1216	C6H5NO2	2-Picolinic acid*	Organic acids	Organic acids	98-98-6	0.191251	-2.38646	down
pme0490	C6H5NO2	Nicotinic acid*	Others	Vitamin	59-67-6	0.199369	-2.32649	down
Lmbp000668	C6H5NO2	Isonicotinic acid*	Organic acids	Organic acids	55-22-1	0.298894	-1.7423	down
mws0251	C5H6N2O2	Thymine	Nucleotides and derivatives	Nucleotides and derivatives	65-71-4	0.039734	-4.65348	down
mws0425	C5H6O4	Citraconic acid	Organic acids	Organic acids	498-23-7	0.192241	-2.37901	down
Lmmn000806	C5H8O4	Dimethylmalonic acid*	Organic acids	Organic acids	595-46-0	0.454773	-1.13678	down
mws0473	C5H8O4	2-Methylsuccinic acid*	Organic acids	Organic acids	498-21-5	0.448707	-1.15616	down
mws0341	C6H12O3	2-Hydroxyisocaproic acid	Organic acids	Organic acids	20312-37-2	2.21598	1.14795	up
HJKP000649	C8H9NO	N-benzylformamide	Alkaloids	Alkaloids	6343-54-0	0.298594	-1.74374	down
mws1336	C7H7NO2	4-Aminobenzoic acid	Phenolic acids	Phenolic acids	150-13-0	0.269782	-1.89014	down
pme2268	C7H7NO2	Trigonelline	Alkaloids	Alkaloids	535-83-1	0.456758	-1.1305	down
pme1002	C8H11NO	L-Tyramine	Amino acids and derivatives	Amino acids and derivatives	51-67-2	0.000135708	-12.8472	down
Lmbn002862	C7H6O3	3-Hydroxybenzoic Acid*	Organic acids	Organic acids	99-06-9	5.01506	2.32627	up
mws0103	C9H7NO	Indole-3-carboxaldehyde	Alkaloids	Plumerane	487-89-8	4.23421	2.08209	up
Wmzn000227	C6H10O4	2,2-Dimethylsuccinic acid	Organic acids	Organic acids	597-43-3	0.471757	-1.08388	down
pme0193	C5H10N2O3	L-Glutamine	Amino acids and derivatives	Amino acids and derivatives	56-85-9	0.187494	-2.41508	down
pme3146	C5H10N2O3	β-Ureidoisobutyric acid	Organic acids	Organic acids	2905-86-4	0.000164057	-12.5735	down
pme0026	C6H14N2O2	L-Lysine	Amino acids and derivatives	Amino acids and derivatives	56-87-1	0.185878	-2.42757	down
mws0847	C6H7N5	1-Methyladenine	Nucleotides and derivatives	Nucleotides and derivatives	5142-22-3	3.0798	1.62284	up
mws0262	C4H6O6	L-Tartaric acid	Organic acids	Organic acids	87-69-4	0.196419	-2.348	down
Zmgn000173	C5H10O5	D-Ribose*	Others	Saccharides and Alcohols	50-69-1	0.09281	-3.42958	down
pme1109	C5H5N5O	Guanine	Nucleotides and derivatives	Nucleotides and derivatives	73-40-5	0.294765	-1.76236	down
Lmgn002473	C7H6O4	2,6-Dihydroxybenzoic acid*	Phenolic acids	Phenolic acids	303-07-1	2.74763	1.45819	up
Lmbp000123	C6H13NO2S	L-Homomethionine	Amino acids and derivatives	Amino acids and derivatives	25148-30-5	0.228945	-2.12693	down
Lmbn002739	C9H8O3	3-Hydroxycinnamic Acid*	Phenolic acids	Phenolic acids	14755-02-3	2.25131	1.17076	up
pme0021	C9H11NO2	L-Phenylalanine	Amino acids and derivatives	Amino acids and derivatives	63-91-2	0.476087	-1.0707	down
pmc0274	C6H6N4S	6-Methylmercaptopurine	Nucleotides and derivatives	Nucleotides and derivatives	50-66-8	0.460616	-1.11836	down
mws0344	C5H10O6	D-Xylonic acid	Organic acids	Organic acids	526-91-0	0.298475	-1.74432	down
mws2125	C3H5O6P	Phosphoenolpyruvate	Organic acids	Organic acids	138-08-9	0.265463	-1.91342	down
MA10039492	C6H6O6	Dehydroascorbic acid	Others	Vitamin	490-83-5	0.469368	-1.09121	down
Lmgn002555	C8H14O4	2-Propylglutaric acid	Organic acids	Organic acids	32806-62-5	2.03588	1.02565	up
Zmyn000155	C7H14N2O3	N-α-Acetyl-L-ornithine	Amino acids and derivatives	Amino acids and derivatives	6205-08-9	0.315303	-1.66519	down
mws0260	C6H14N4O2	L-Arginine	Amino acids and derivatives	Amino acids and derivatives	74-79-3	0.226366	-2.14327	down
mws1074	C9H6O4	Daphnetin*	Lignans and Coumarins	Coumarins	486-35-1	0.074864	-3.73958	down
pmb2795	C10H10O3	4-Methoxycinnamic acid*	Phenolic acids	Phenolic acids	830-09-1	2.24643	1.16764	up
mws0093	C10H12O3	Coniferyl alcohol	Phenolic acids	Phenolic acids	458-35-5	0.000373416	-11.3869	down
mws0250	C9H11NO3	L-Tyrosine	Amino acids and derivatives	Amino acids and derivatives	60-18-4	0.294413	-1.76409	down
mws1350	C9H10O4	Syringaldehyde; 4-Hydroxy-3,5-Dimethoxybenzaldehyde	Phenolic acids	Phenolic acids	134-96-3	2.30577	1.20525	up
Zmgn000447	C3H7O7P	3-Phospho-D-glyceric acid	Others	Saccharides and Alcohols	820-11-1	0.28126	-1.83003	down
pme0122	C8H16N2O3	N6-Acetyl-L-lysine	Amino acids and derivatives	Amino acids and derivatives	692-04-6	0.312541	-1.67788	down
Zmjp000182	C7H16N4O2	N-Monomethyl-L-arginine	Amino acids and derivatives	Amino acids and derivatives	17035-90-4	0.490123	-1.02879	down
Hmjp002337	C10H8O4	Isoscopoletin (6-Hydroxy-7-Methoxycoumarin)	Lignans and Coumarins	Coumarins	776-86-3	2.71275	1.43975	up
mws0014	C10H10O4	Ferulic acid	Phenolic acids	Phenolic acids	537-98-4	0.240185	-2.05778	down
pme0534	C6H12O7	Gluconic acid	Others	Saccharides and Alcohols	526-95-4	0.498983	-1.00294	down
pmb2497	C9H10O5	4-Hydroxy-3-methoxymandelate	Phenolic acids	Phenolic acids	55-10-7	0.453832	-1.13977	down
NK10251888	C8H18N4O2	NG,NG-Dimethyl-L-arginine	Amino acids and derivatives	Amino acids and derivatives	30315-93-6	0.267137	-1.90435	down
pme2060	C10H13N5	N6-Isopentenyladenine	Nucleotides and derivatives	Nucleotides and derivatives	2365-40-4	0.000139164	-12.8109	down
Zmgn002106	C11H13NO3	N-Acetyl-L-phenylalanine	Amino acids and derivatives	Amino acids and derivatives	2018-61-3	2.11501	1.08066	up
mws5045	C12H24O3	12-Hydroxydodecanoic acid	Lipids	Free fatty acids	505-95-3	2.70206	1.43406	up
pme1194	C9H13N3O4	2'-Deoxycytidine	Nucleotides and derivatives	Nucleotides and derivatives	951-77-9	2.54782	1.34927	up
pmb0962	C10H22N2O4	L-Lysine-Butanoic Acid	Amino acids and derivatives	Amino acids and derivatives	80407-71-2	0.23831	-2.06909	down
Zmyn000110	C6H14NO8P	D-Glucosamine 1-phosphate	Others	Saccharides and Alcohols	2152-75-2	0.180449	-2.47033	down
pme3313	C6H13O9P	D-Fructose 6-phosphate*	Others	Saccharides and Alcohols	643-13-0	0.458553	-1.12484	down
mws0715	C13H16N2O4	Phenylacetyl-L-glutamine	Amino acids and derivatives	Amino acids and derivatives	28047-15-6	5.26343	2.396	up
mws0383	C17H32O2	Cis-10-Heptadecenoic Acid	Lipids	Free fatty acids	29743-97-3	0.427007	-1.22767	down
pmp000791	C15H10O5	Moracin Y	Others	Others	1252581-54-6	0.0547291	-4.19155	down
mws2623	C18H34O2	11-Octadecanoic acid(Vaccenic acid)	Lipids	Free fatty acids	506-17-2	0.421657	-1.24586	down
mws0396	C18H34O2	Elaidic Acid	Lipids	Free fatty acids	112-79-8	0.444672	-1.16919	down
pmn001511	C13H18O7	3-Hydroxy-5-Methylphenol-1-O-Glucoside	Phenolic acids	Phenolic acids	-	2.4618	1.29971	up
pme3609	C15H11O6+	Cyanidin	Flavonoids	Anthocyanins	13306-05-3	0.0669064	-3.90171	down
pme1474	C11H15N5O3S	5'-Deoxy-5'-(methylthio)adenosine	Nucleotides and derivatives	Nucleotides and derivatives	2457-80-9	0.459731	-1.12114	down
Lmhn001386	C12H12O9	Vnilloyltartaric acid	Phenolic acids	Phenolic acids	-	0.491338	-1.02521	down
pme3514	C15H10O7	Morin	Flavonoids	Flavonols	6472-38-4	0.11209	-3.15727	down
mws0044	C15H12O7	Dihydroquercetin(Taxifolin)	Flavonoids	Dihydroflavonol	480-18-2	2.58651	1.371	up
pmn001610	C20H36O2	Eicosadienoic acid	Lipids	Free fatty acids	5598-38-9	0.487811	-1.03561	down
pmp000798	C19H18O4	Moracin S1	Others	Others	-	1440.25	10.4921	up
pme3967	C12H17N5O5	2-(Dimethylamino)guanosine	Nucleotides and derivatives	Nucleotides and derivatives	2140-67-2	0.242897	-2.04158	down
Rfmb087	C18H32O4	9-Hydroxy-13-oxo-10-octadecenoic Acid	Lipids	Free fatty acids	-	3.28951	1.71787	up
Lmdp003808	C16H12O7	Azaleatin (5-O-Methylquercetin)	Flavonoids	Flavonols	529-51-1	0.00163373	-9.25762	down
mws0066	C16H12O7	Isorhamnetin	Flavonoids	Flavonols	480-19-3	0.000272188	-11.8431	down
mws0983	C20H39NO2	N-Oleoylethanolamine	Alkaloids	Alkaloids	111-58-0	0.478823	-1.06244	down
Lmsp011263	C18H16O6	6-Hydroxy-5,7,4'-trimethoxyflavone	Flavonoids	Flavonoid	6938-19-8	0.13348	-2.9053	down
Zmhn001883	C14H18O9	Vanillic acid-4-O-glucoside*	Phenolic acids	Phenolic acids	32142-31-7	0.0179995	-5.7959	down
pmn001694	C18H34O5	9,10,13-Trihydroxy-11-Octadecenoic Acid	Lipids	Free fatty acids	29907-57-1	3.33463	1.73753	up
pmc0066	C10H13N4O7P	2'-Deoxyinosine-5'-monophosphate	Nucleotides and derivatives	Nucleotides and derivatives	3393-18-8	2.72908	1.44841	up
pma6460	C16H18O8	4-O-p-Coumaroylquinic acid*	Phenolic acids	Phenolic acids	32451-86-8	2.7788	1.47446	up
pmn001421	C16H18O8	3-O-p-Coumaroylquinic acid*	Phenolic acids	Phenolic acids	87099-71-6	3.29039	1.71826	up
pmb3074	C16H18O8	5-O-p-Coumaroylquinic acid*	Phenolic acids	Phenolic acids	1899-30-5	3.10693	1.63549	up
pmn001420	C15H18O9	1-O-[(E)-Caffeoyl]-D-glucose*	Phenolic acids	Phenolic acids	-	0.246623	-2.01962	down
Zmhn001793	C15H18O9	6-O-Caffeoyl-D-glucose*	Phenolic acids	Phenolic acids	-	0.242379	-2.04466	down
mws0906	C16H22O8	Coniferin	Phenolic acids	Phenolic acids	531-29-3	0.360125	-1.47343	down
Lmtn000940	C14H18O10	1-O-(3,4-Dihydroxy-5-methoxy-benzoyl)-glucoside	Phenolic acids	Phenolic acids	-	8.62435	3.10842	up
pmb1562	C21H34O4	1-Stearidonoyl-Glycerol	Lipids	Glycerol ester	-	2.21939	1.15016	up
Lmhp112042	C21H38O4	1-Linoleoylglycerol*	Lipids	Glycerol ester	2277-28-3	0.305641	-1.71009	down
Lmdn004267	C20H22O6	Epipinoresinol*	Lignans and Coumarins	Lignans	24404-50-0	0.195233	-2.35673	down
mws0097	C20H22O6	Pinoresinol*	Lignans and Coumarins	Lignans	487-36-5	0.186539	-2.42245	down
pmb0998	C10H14N5O8P	Guanosine 5'-monophosphate	Nucleotides and derivatives	Nucleotides and derivatives	85-32-5	0.317466	-1.65532	down
Lmgp003270	C16H16O10	Scopoletin-7-O-glucuronide	Lignans and Coumarins	Coumarins	132752-65-9	3.64445	1.8657	up
pma3724	C17H20O9	1-O-Feruloylquinic acid*	Phenolic acids	Phenolic acids	-	3.2291	1.69113	up
Lmgn003073	C17H20O9	5-O-Feruloylquinic acid*	Phenolic acids	Phenolic acids	-	12.6857	3.66514	up
pmb0752	C17H20O9	3-O-Feruloylquinic acid	Phenolic acids	Phenolic acids	1899-29-2	2.81271	1.49196	up
Lmbp003668	C20H18O10	Kaempferol-3-O-arabinoside	Flavonoids	Flavonoid	-	0.268596	-1.89649	down
pme2117	C10H15N5O10P2	Adenosine 5'-diphosphate	Nucleotides and derivatives	Nucleotides and derivatives	58-64-0	0.444001	-1.17136	down
pme3392	C21H21O10+	Pelargonidin-3-O-glucoside	Flavonoids	Anthocyanins	47684-27-5	5.921	2.56584	up
pme2459	C21H20O11	Luteolin-7-O-glucoside (Cynaroside)	Flavonoids	Flavonoid	5373-11-5	0.010012	-6.64213	down
pmf0027	C21H21O11+	Cyanidin-3-O-galactoside*	Flavonoids	Anthocyanins	142506-26-1	13.5278	3.75785	up
pmb0550	C21H21O11+	Cyanidin-3-O-glucoside (Kuromanin)*	Flavonoids	Anthocyanins	47705-70-4	13.0635	3.70747	up
mws0057	C21H22O11	Eriodictyol-7-O-glucoside*	Flavonoids	Dihydroflavone	38965-51-4	0.0645575	-3.95327	down
Lmhp008763	C21H42NO7P	LysoPE 16:1(2n isomer)*	Lipids	LPE	-	0.0371714	-4.74966	down
Lmhp009034	C21H42NO7P	LysoPE 16:1*	Lipids	LPE	-	0.01694	-5.88342	down
pmd0160	C21H44NO7P	LysoPE 16:0(2n isomer)	Lipids	LPE	-	0.13652	-2.87281	down
pmb0876	C21H44NO7P	LysoPE 16:0*	Lipids	LPE	53862-35-4	0.144271	-2.79314	down
pmb0464	C16H27NO14	L-Aspartic acid-O-diglucoside	Amino acids and derivatives	Amino acids and derivatives	-	0.373241	-1.42182	down
Hmdn001667	C20H16O13	Ellagic acid-4-O-glucoside	Tannins	Tannin	-	2.75551	1.46232	up
Lmzp002365	C22H24O11	Hesperetin-7-O-glucoside	Flavonoids	Flavonoid	31712-49-9	2.13677	1.09543	up
pmd0130	C22H46NO7P	LysoPC 14:0	Lipids	LPC	20559-16-4	0.0696535	-3.84366	down
Lmhp008589	C23H42NO7P	LysoPE 18:3(2n isomer)*	Lipids	LPE	-	0.0578771	-4.11086	down
Lmhp008801	C23H42NO7P	LysoPE 18:3*	Lipids	LPE	-	0.0552382	-4.17819	down
pmb0881	C23H44NO7P	LysoPE 18:2*	Lipids	LPE	-	0.0711352	-3.81329	down
pmb0874	C23H44NO7P	LysoPE 18:2(2n isomer)*	Lipids	LPE	-	0.0622528	-4.00572	down
Lmjp002906	C22H22O12	Rhamnetin-3-O-Glucoside*	Flavonoids	Flavonols	27875-34-9	0.00222926	-8.80922	down
Hmcp002207	C22H22O12	Isorhamnetin-7-O-glucoside (Brassicin)*	Flavonoids	Flavonols	6743-96-0	0.00204126	-8.93632	down
Lmyp004444	C22H22O12	Tricin-4'-methylether-3'-O-glucoside*	Flavonoids	Flavonols	-	0.00232647	-8.74764	down
mws0289	C23H46NO7P	LysoPE 18:1*	Lipids	LPE	89576-29-4	0.0109457	-6.51349	down
pmb2260	C23H46NO7P	LysoPC 15:1	Lipids	LPC	-	0.0901512	-3.47151	down
pmb0856	C23H46NO7P	LysoPE 18:1(2n isomer)*	Lipids	LPE	-	0.0125488	-6.31631	down
pmb2319	C23H48NO7P	LysoPC 15:0*	Lipids	LPC	108273-89-8	0.0669163	-3.9015	down
Lmhp009129	C23H48NO7P	LysoPC 15:0(2n isomer)*	Lipids	LPC	-	0.0785261	-3.67068	down
Lmmp003903	C23H22O12	Kaempferol-3-O-(2''-acetyl)glucoside*	Flavonoids	Flavonols	-	0.143525	-2.80063	down
Lmmn003398	C23H22O12	Kaempferol-3-O-(6''-acetyl)glucoside*	Flavonoids	Flavonols	-	0.000923449	-10.0807	down
Lmhp008833	C24H48NO7P	LysoPC 16:1(2n isomer)*	Lipids	LPC	-	0.0541245	-4.20757	down
pmp001270	C24H48NO7P	LysoPC 16:1*	Lipids	LPC	76790-27-7	0.0578628	-4.11122	down
pmd0132	C24H50NO7P	LysoPC 16:0(2n isomer)*	Lipids	LPC	-	0.0909622	-3.45859	down
pmb0855	C24H50NO7P	LysoPC 16:0*	Lipids	LPC	17364-16-8	0.437248	-1.19348	down
Lmgp003989	C25H22O11	Dicaffeoylshikimic acid	Phenolic acids	Phenolic acids	-	7.20767	2.84953	up
pmb3064	C22H28O13	3-O-p-Coumaroylquinic acid O-glucoside*	Phenolic acids	Phenolic acids	-	2.26752	1.18112	up
Lmhp009802	C25H46NO7P	LysoPE 20:3(2n isomer)*	Lipids	LPE	-	0.0234767	-5.41263	down
Lmhp010040	C25H46NO7P	LysoPE 20:3*	Lipids	LPE	-	0.0281951	-5.14841	down
pmb3000	C24H24O12	Chrysoeriol-7-O-(6''-acetyl)glucoside	Flavonoids	Flavonoid	-	0.00641656	-7.28398	down
Lmhp008718	C25H48NO7P	LysoPC 17:2	Lipids	LPC	-	0.0743261	-3.74999	down
Lmhp010514	C25H48NO7P	LysoPE 20:2(2n isomer)*	Lipids	LPE	-	0.0247597	-5.33586	down
Lmhp010757	C25H48NO7P	LysoPE 20:2*	Lipids	LPE	-	0.0232673	-5.42555	down
Zmsp004363	C23H22O13	Quercetin-3-O-(6''-acetyl)glucoside*	Flavonoids	Flavonols	-	0.0248407	-5.33115	down
Hmln002199	C23H22O13	Quercetin-3-O-(6''-acetyl)galactoside*	Flavonoids	Flavonols	-	0.00123799	-9.65779	down
Lmhp009590	C25H50NO7P	LysoPC 17:1	Lipids	LPC	-	0.0468964	-4.41438	down
pmb2406	C25H52NO7P	LysoPC 17:0	Lipids	LPC	50930-23-9	0.0846957	-3.56157	down
Lmgp004518	C26H24O11	Caffeoylferuloylshikimic acid	Phenolic acids	Phenolic acids	-	2.57916	1.3669	up
Hmqp006235	C21H46N3O9P	LysoPC 18:4	Lipids	LPC	-	0.100338	-3.31706	down
Li512115	C25H24O12	Isochlorogenic acid B*	Phenolic acids	Phenolic acids	14534-61-3	6.8531	2.77676	up
Lmhp010573	C27H48O9	1-Linoleoylglycerol-3-O-glucoside*	Lipids	Glycerol ester	-	0.478113	-1.06458	down
pmb0854	C26H48NO7P	LysoPC 18:3*	Lipids	LPC	-	0.0907257	-3.46234	down
pmb0865	C26H48NO7P	LysoPC 18:3(2n isomer)*	Lipids	LPC	-	0.0968391	-3.36827	down
pmp001251	C26H50NO7P	LysoPC 18:2(2n isomer)*	Lipids	LPC	-	0.153539	-2.70332	down
pmp001273	C26H50NO7P	LysoPC 18:2*	Lipids	LPC	-	0.157197	-2.66935	down
pmn001644	C23H20O14	Quercetin-3-O-(2''-acetyl)glucuronide	Flavonoids	Flavonols	-	0.000336121	-11.5387	down
pmn001378	C26H32O11	Pinoresinol-4-O-glucoside	Lignans and Coumarins	Lignans	41607-20-9	2.67618	1.42018	up
Lmhp010190	C26H52NO7P	LysoPC 18:1(2n isomer)*	Lipids	LPC	-	0.0269665	-5.21269	down
pmp001281	C26H52NO7P	LysoPC 18:1*	Lipids	LPC	-	0.0255127	-5.29264	down
HJN083	C26H34O11	Lariciresinol-4'-O-glucoside	Lignans and Coumarins	Lignans	143663-00-7	0.367534	-1.44405	down
pmd0136	C26H54NO7P	LysoPC 18:0(2n isomer)*	Lipids	LPC	-	0.0645136	-3.95425	down
mws0126	C26H54NO7P	LysoPC 18:0*	Lipids	LPC	19420-57-6	0.274616	-1.86451	down
Lmtn003096	C26H36O11	(-)-Secoisolariciresinol 4-O-glucoside	Lignans and Coumarins	Lignans	-	2.28901	1.19472	up
Lmhp007840	C27H52NO7P	LysoPC 19:2*	Lipids	LPC	-	0.0873987	-3.51624	down
Lmhp007598	C27H52NO7P	LysoPC 19:2(2n isomer)*	Lipids	LPC	-	0.172504	-2.5353	down
Lmdp004892	C24H22O14	Kaempferol-3-O-(6''-malonyl)galactoside*	Flavonoids	Flavonols	-	0.0023863	-8.71101	down
Lmmp003817	C24H22O14	Kaempferol-3-O-(6''-malonyl)glucoside*	Flavonoids	Flavonols	-	0.00217216	-8.84665	down
pmp000587	C24H22O14	Luteolin-7-O-(6''-malonyl)glucoside*	Flavonoids	Flavonoid	-	0.000117885	-13.0503	down
Lmhp010908	C27H54NO7P	LysoPC 19:1	Lipids	LPC	-	0.00517304	-7.59477	down
Zmfn000481	C14H22N2O16P2	Uridine-5'-Diphosphate-D-Xylose	Nucleotides and derivatives	Nucleotides and derivatives	3616-06-6	0.471518	-1.08461	down
Lmhp009890	C28H52NO7P	LysoPC 20:3	Lipids	LPC	1199257-41-4	0.0358687	-4.80113	down
Lmhp011549	C28H56NO7P	LysoPC 20:1	Lipids	LPC	-	0.027596	-5.1794	down
pmp000589	C24H22O15	Quercetin-7-O-(6''-malonyl)glucoside*	Flavonoids	Flavonols	-	0.00122034	-9.6785	down
Hmln002321	C24H22O15	Quercetin-3-O-(6''-malonyl)glucoside*	Flavonoids	Flavonols	-	0.00149731	-9.38341	down
Hmln002189	C24H22O15	Quercetin-3-O-(6''-malonyl)galactoside*	Flavonoids	Flavonols	-	0.00136784	-9.51389	down
HJAP064	C25H24O15	Isorhamnetin-3-O-(6''-malonylglucoside)*	Flavonoids	Flavonoid	-	2.12775e-05	-15.5203	down
Zmhp005139	C25H24O15	Tamarixetin-3-O-(6''-malonyl)glucoside*	Flavonoids	Flavonoid	-	2.1748e-05	-15.4888	down
HJAP148	C26H28O15	Kaempferol-3-O-sambubioside	Flavonoids	Flavonoid	27661-51-4	0.0662277	-3.91642	down
pmp001079	C27H30O15	Luteolin-7-O-neohesperidoside (Lonicerin)*	Flavonoids	Flavonoid	25694-72-8	3.57705e-06	-18.0928	down
pme1793	C27H31O15+	Pelargonidin-3,5-O-diglucoside	Flavonoids	Anthocyanins	17334-58-6	7892.26	12.9462	up
pme1773	C27H31O15+	Cyanidin-3-O-rutinoside (Keracyanin)	Flavonoids	Anthocyanins	28338-59-2	8.42758	3.07512	up
Lmjp002461	C27H30O16	Quercetin-3-O-neohesperidoside*	Flavonoids	Flavonols	117611-67-3	2.1708e-05	-15.4914	down
Hmpp002612	C27H30O16	Luteolin-7-O-gentiobioside	Flavonoids	Flavonoid	-	0.0671493	-3.89648	down
pmn001583	C27H30O16	Quercetin-3-O-robinobioside*	Flavonoids	Flavonols	52525-35-6	2.68787e-05	-15.1832	down
Lmcp004436	C30H27O14+	Cyanidin-3-O-(6''-O-caffeoyl)glucoside*	Flavonoids	Anthocyanins	-	0.061036	-4.03419	down
Zmcp002924	C27H31O16+	Cyanidin-3-O-(2''-O-glucosyl)glucoside	Flavonoids	Anthocyanins	38820-68-7	4.30715	2.10673	up
Lmhp003217	C28H32O16	2'-Hydoxy,5-methoxyGenistein-O-rhamnosyl-glucoside*	Flavonoids	Isoflavones	-	0.0662972	-3.91491	down
Lmmp002963	C28H32O16	6-C-Methylquercetin-3-O-rutinoside*	Flavonoids	Flavonols	-	0.0162005	-5.94782	down
Lmmp002463	C28H32O16	Sexangularetin-3-O-glucoside-7-O-rhamnoside*	Flavonoids	Flavonols	-	0.0680077	-3.87816	down
pme1540	C28H32O16	Isorhamnetin-3-O-neohesperidoside*	Flavonoids	Flavonols	55033-90-4	0.0164697	-5.92405	down
Lmpp003815	C31H29O14+	Petunidin-3-O-(6''-O-p-Coumaroyl)glucoside	Flavonoids	Anthocyanins	-	0.0629845	-3.98886	down
pmb2970	C28H34O16	Hesperetin-5,7-di-O-glucoside	Flavonoids	Dihydroflavonol	-	3.78817	1.9215	up
Lmhp002800	C28H32O17	2'-Hydoxy,5-methoxyGenistein-4',7-O-diglucoside	Flavonoids	Isoflavones	-	0.000396649	-11.2998	down
Lmnp002448	C28H32O17	5,7,3',4'-Tetrahydroxy-6-methoxyflavone-8-C-[glucosyl-(1-2)]-glucoside	Flavonoids	Flavonoid carbonoside	-	1.17507e-05	-16.3769	down
pmb2653	C24H42O20	D(+)-Melezitose O-rhamnoside	Others	Saccharides and Alcohols	-	0.412744	-1.27668	down
Hmln001836	C29H32O17	Kaempferol-3-O-(6''-Acetyl)glucosyl-(1→3)-Galactoside	Flavonoids	Flavonols	-	0.100453	-3.31541	down
pmb0530	C21H27N7O14P2	Nicotinic acid adenine dinucleotide	Nucleotides and derivatives	Nucleotides and derivatives	53-84-9	0.386629	-1.37098	down
Hmln001682	C29H32O18	Quercetin-3-O-(6''-acetyl)glucosyl-(1→3)-Galactoside	Flavonoids	Flavonols	-	0.000102424	-13.2532	down
Lmxp010913	C35H66NO9P	1-(9Z-Octadecenoyl)-2-(9-oxo-nonanoyl)-sn-glycero-3-phosphocholine	Lipids	Glycerol ester	-	0.128132	-2.9643	down
Lmgn002250	C31H34O17	Dicaffeoylquinic acid-O-glucoside	Phenolic acids	Phenolic acids	-	0.482008	-1.05287	down
Lmhp009190	C33H58O14	2-Linoleoylglycerol-1,3-di-O-glucoside*	Lipids	Glycerol ester	-	0.465514	-1.1031	down
Lmhp009384	C33H58O14	1-Linoleoylglycerol-2,3-di-O-glucoside*	Lipids	Glycerol ester	-	0.408976	-1.28991	down
Hmlp003185	C30H32O18	Luteolin-7-O-(6''-malonyl)glucoside-5-O-rhamnoside	Flavonoids	Flavonoid	-	0.00380404	-8.03825	down
Hmcp001629	C30H32O19	Kaempferol-3-O-(6''-Malonyl)glucoside-7-O-Glucoside	Flavonoids	Flavonols	-	0.00558877	-7.48325	down
Lmgn002253	C31H36O18	Syringoylcaffeoylquinic acid-D-glucose	Phenolic acids	Phenolic acids	-	0.321332	-1.63786	down
pmb0709	C30H32O20	Quercetin-7-O-(6''-malonyl)glucosyl-5-O-glucoside*	Flavonoids	Flavonols	-	6.70193e-05	-13.8651	down
pmb0706	C30H32O20	Quercetin-5-O-(6''-malonyl)glucosyl-5-O-glucoside*	Flavonoids	Flavonols	-	3.06195e-06	-18.3171	down
Zmlp003063	C33H40O19	Luteolin-7-O-(2''-O-rhamnosyl)rutinoside*	Flavonoids	Flavonoid	-	0.486153	-1.04052	down
pme2651	C21H28N7O17P3	NADP (Nicotinamide adenine dinucleotide phosphate)	Nucleotides and derivatives	Nucleotides and derivatives	53-59-8	0.364629	-1.4555	down
Lmcp004347	C35H35O18+	Cyanidin-3-O-(6''-O-caffeoyl-2''-O-xylosyl)glucoside	Flavonoids	Anthocyanins	-	0.341093	-1.55176	down
HJAP127	C33H40O20	Quercetin-3-O-(2''-O-Rhamnosyl)rutinoside*	Flavonoids	Flavonols	55696-57-6	0.347067	-1.52672	down
Zmmp003591	C33H41O20+	Delphinidin-3-O-(2'''-O-p-coumaroyl)rutinoside	Flavonoids	Anthocyanins	-	0.347856	-1.52344	down
Hmcp001589	C34H42O21	Isorhamnetin-3-O-rutinoside-4'-O-glucoside	Flavonoids	Flavonols	111393-97-6	0.158067	-2.66139	down
Zmmp003451	C42H47O22+	Cyanidin-3-O-(6''-O-p-coumaroyl)rutinoside-5-O-glucoside	Flavonoids	Anthocyanins	-	7.04894e-05	-13.7922	down
Cwjp002681	C42H46O23	Kaempferol-3-O-(2'''-p-Coumaroyl)sophoroside-7-O-Glucoside	Flavonoids	Flavonols	-	0.000229293	-12.0905	down
